# Supplementary material for: Preliminary Validation of a Food Frequency Questionnaire to Assess Long-Chain Omega-3 Fatty Acid Intake in Eye Care Practice
Source: MDPI journal article supplement (doi:10.3390/nu11040817), 2019-04-11
Supplement: s1 [file s1]

## Clinical Omega-3 Dietary Survey

How many times have you eaten fish or shellfish in the past week?

- 0 times   
  1-3 times   
  More than 3 times

Over the past 3 months, about how often have you eaten fish or shellfish in any form?

- Never   
  \_\_\_\_\_ times per *(please circle)* Day/Week/Month

Each time you ate fish or shellfish, how much did you eat?

- Less than 50 g or half a fillet or less than 4 pieces/1-2 hand roll of sushi  
 100 g or about 1 small fillet or 8 pieces of sushi/3 hand rolls  
 150 g or 1 large fillet or 12 pieces of sushi/4 hand rolls  
 200 g+ or more than 2 fillets or 16 pieces of sushi/6 hand rolls

Please mark the food(s) you eat regularly (i.e., at least once per month) over the last three (3) months and indicate:

- your average portion for **EACH** serve
- on average, how often you eat that type of food

90 g = approximately the size of your palm or a deck of cards.

### Seafood

- |                                  |         |                          |
|----------------------------------|---------|--------------------------|
| <input type="checkbox"/> Anchovy | ..... g | ..... times a week/month |
| <input type="checkbox"/> Eel     | ..... g | ..... times a week/month |
| <input type="checkbox"/> Mussel  | ..... g | ..... times a week/month |
| <input type="checkbox"/> Oyster  | ..... g | ..... times a week/month |
| <input type="checkbox"/> Scallop | ..... g | ..... times a week/month |
| <input type="checkbox"/> Prawn   | ..... g | ..... times a week/month |
| <input type="checkbox"/> Squid   | ..... g | ..... times a week/month |

### Fish

- |                                             |         |                          |
|---------------------------------------------|---------|--------------------------|
| <input type="checkbox"/> Barramundi         | ..... g | ..... times a week/month |
| <input type="checkbox"/> Bassa (Basa)       | ..... g | ..... times a week/month |
| <input type="checkbox"/> Hoki               | ..... g | ..... times a week/month |
| <input type="checkbox"/> Blue Eye Trevalla  | ..... g | ..... times a week/month |
| <input type="checkbox"/> Kingfish/Trevally  | ..... g | ..... times a week/month |
| <input type="checkbox"/> Herring            | ..... g | ..... times a week/month |
| <input type="checkbox"/> Mackerel           | ..... g | ..... times a week/month |
| <input type="checkbox"/> Salmon             | ..... g | ..... times a week/month |
| <input type="checkbox"/> Sardine            | ..... g | ..... times a week/month |
| <input type="checkbox"/> Silver perch       | ..... g | ..... times a week/month |
| <input type="checkbox"/> Snapper            | ..... g | ..... times a week/month |
| <input type="checkbox"/> Swordfish          | ..... g | ..... times a week/month |
| <input type="checkbox"/> Trout              | ..... g | ..... times a week/month |
| <input type="checkbox"/> Tuna               | ..... g | ..... times a week/month |
| <input type="checkbox"/> Whiting            | ..... g | ..... times a week/month |
| <input type="checkbox"/> Fish fingers       | ..... g | ..... times a week/month |
| <input type="checkbox"/> Fish (white flesh) | ..... g | ..... times a week/month |

|                          |                                                   |                                     |
|--------------------------|---------------------------------------------------|-------------------------------------|
| Other meats              |                                                   |                                     |
| <input type="checkbox"/> | Bacon                                             | ..... g ..... times a week/month    |
| <input type="checkbox"/> | Beef                                              | ..... g ..... times a week/month    |
| <input type="checkbox"/> | Kangaroo                                          | ..... g ..... times a week/month    |
| <input type="checkbox"/> | Lamb                                              | ..... g ..... times a week/month    |
| <input type="checkbox"/> | Salami                                            | ..... g ..... times a week/month    |
| <input type="checkbox"/> | Pork                                              | ..... g ..... times a week/month    |
| <input type="checkbox"/> | Egg (per egg)                                     | ..... eggs ..... times a week/month |
| Omega-3 Supplements      |                                                   |                                     |
| <input type="checkbox"/> | Omega-3/Fish oil (please specify Brand/type/dose) | ..... g/caps/TBS                    |
| .....                    |                                                   | ..... times a day/week              |

**Figure S1:** Clinical Omega-3 Dietary Survey (CODS)

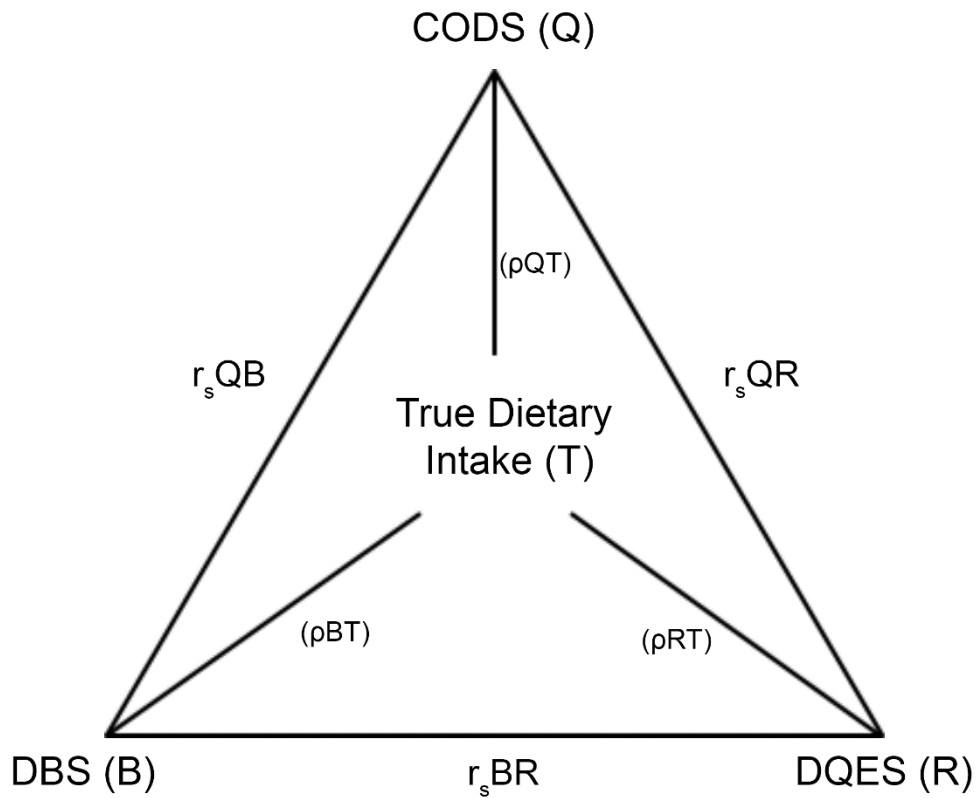

**Figure S2:** Diagram adapted from Ocke & Kaaks, to describe the ‘method of triads’ [43] used to estimate the validity coefficient ( $\rho$ ) for long-chain omega-3 dietary intake estimated using the questionnaire (Q), Clinical Omega-3 Dietary Survey (CODS); a reference marker (R), the Dietary Questionnaire for Epidemiology Studies (DQES) v3.2; and a biomarker (B), the dried blood spot (DBS) test. Spearman’s correlation coefficient ( $r_s$ ) was used to estimate the correlation coefficient between each method. Validity coefficients ( $\rho$ ) were calculated using methods as described by Ocke & Kraaks for each of the reference methods against an estimated true intake (T) [43].
